# Supplementary material for: Taking stock of decentralized disaster risk reduction in Indonesia
Source: Copernicus journal article supplement (doi:10.5194/nhess-16-2145-2016), 2016-09-27
Supplement: Supplementary file 1 [file nhess-16-2145-2016-supplement.pdf]

Supplement of Nat. Hazards Earth Syst. Sci., 16, 2145–2157, 2016  
<http://www.nat-hazards-earth-syst-sci.net/16/2145/2016/>  
doi:10.5194/nhess-16-2145-2016-supplement  
© Author(s) 2016. CC Attribution 3.0 License.

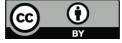

Natural Hazards  
and Earth System  
Sciences Open Access 

*Supplement of*

## **Taking stock of decentralized disaster risk reduction in Indonesia**

**Anthony Grady et al.**

*Correspondence to:* Anthony Grady (anthonygrady4@gmail.com)

The copyright of individual parts of the supplement might differ from the CC-BY 3.0 licence.

# 1 **Supplementary material A: Legal and policy context for**

## 2 **DRR**

3 The Disaster Management Law of 2007 is the foundation of the current DRR policy  
4 framework in Indonesia. It was the result of a movement to improve DRM in Indonesia with  
5 external assistance from UNDP, UN OCHA and others (UNDP, 2009a). The Indonesian  
6 Society for Disaster Management (MPBI) led the lobbying and advocacy to pass the bill. The  
7 law directs a paradigm shift from emergency response to DRR, recognising people's basic  
8 right to protection and placing the government responsible in this regard (BNPb. National  
9 Disaster Management Plan 2010-2014). Several ancillary pieces of legislation were  
10 subsequently passed, providing for areas such as the involvement of the international  
11 community in disaster response.

12 The National Plan for Disaster Management (NP DM) 2010-2014 is the current strategic plan  
13 for DRR, serving as a guidance document for DRR in the areas of policy, priority setting and  
14 mainstreaming (COE-DMHA, 2011). Line ministries and agencies are required to adhere to  
15 the National Plan for Disaster Management 2010-2014 in developing their Strategic Plans  
16 and through annual implementation of their Ministry's/Agency's Work Plan. National Action  
17 Plan for DRR (NAP-DRR) 2010-2012 is the operational plan for DRR and details the action  
18 plans and programmes of all stakeholders, including government, NGOs, the international  
19 community and the private sector, in DRR at the national level.

20 The environment and disaster management together make up one of the eleven national  
21 priorities of the National Medium-Term Plan (RPJMN) 2010-2014. This plan sets the  
22 foundation of the Strategic Plans (RENSTRA) by line ministries and government agencies.
